# Supplementary material for: Precision information extraction for rare disease epidemiology at scale
Source: Springer Nature journal article supplement (doi:10.1186/s12967-023-04011-y), 2023-02-28
Supplement: MOESM2 [file 24075198]

# Precision Information Extraction for Rare Disease Epidemiology at Scale: A Deep Learning Approach

## Supplementary Methods 1

William Z. Kariampuzha, B.S.,  
Gioconda Alyea, M.D., Chunxu Qu, Ph.D.,  
Haley Chatelaine, Ph.D., Jaleal Sanjak, Ph.D., Arjun Yadaw, Ph.D.,  
Ewy Mathé, Ph.D., Eric Sid, M.D., Yanji Xu, Ph.D.,  
Qian Zhu, Ph.D.

February 2022

## 1 Pre-Labeling Algorithm

|                                                                                                                                               |
|-----------------------------------------------------------------------------------------------------------------------------------------------|
| <p><b>Input</b> : List of sentences from a Rare Disease Epidemiology Abstract Corpus</p> <p><b>Output</b>: List of tokens and IOB2 labels</p> |
|-----------------------------------------------------------------------------------------------------------------------------------------------|

Algorithm runs in  $O(n)$  time.

### 1.1 Define Sets of Terms to Label:

The set of epidemiological (epi) types we wish to label are constructed from four sets of terms gathered from a corpus analysis:

1. epi roots = {incidence(s),prevalence(s),occurrence(s), prevalent }
2. epi conditional-roots = {affect(s), occurs, frequency, frequencies }
3. epi pre-root-modifiers = {annual, overall, estimated, weighted, nationwide, pooled, average, cumulative, annualized, age-adjusted, sex-adjusted, associated, population-based, calculated, combined, corrected, familial, race/ethnicity-specific, race-specific, birth, community-based, point, total, age-specific, ethnicity-specific }
4. epi post-root-modifiers = {estimate(s), rate(s)}

**Set of epi types** = all phrases of the forms

- “pre-root-modifier::root::post-root-modifier”
- “pre-root-modifier::root”
- “root::post-root-modifier”
- “root”

**Set of conditional epi types** = all phrases of the forms

- “pre-root-modifier::conditional-root::post-root-modifier”
- “pre-root-modifier::conditional-root”
- “conditional-root::post-root-modifier”

*Note:* Conditional phrases are only labeled when an epidemiologic rate is in the same sentence.

**Set of Ethnicities, Nationalities, & Races** = unprocessed and stemmed terms gathered from Wikipedia

**Set of Rare Diseases** = disease names and synonyms from GARD Knowledge graph

**Set of Biological Sexes** = {male(s), female(s), girl(s), boy(s), man, men, woman, women, intersex, XYY, XXY, XXXY, Klinefelter syndrome, Klinefelter}

*Note:* Turner syndrome is not included because it is already a rare disease

**Set of Dates** = all dates from January 1, 1900 – December 31, 2021 in the forms (day month year), (month day year), (month day , year), (month day, year), (month year), (year)

**Set of Epi Rate Modifiers** = {between, around, approximately, about, <, >, roughly, relatively, over, under, than}

**Set of Range Terms** = {-, -, -, -, —, —, -, and, to, until}

*Note:* These terms indicate that two entities may be connected e.g. June 2021 – February 2022 or 1/100,000 - 3/100,000 live births

## 1.2 Function used in the algorithm

```

Function combineEntities(tokens : list, labels : list) is
  for each (token, label) in lists of tokens and labels do
    if token is in set of range words then
      if token is '<' OR '>' then
        | label ← STAT
      end
      if token is 'than' then
        | label ← STAT
        | label_before ← STAT
      end
      if (token is 'birth(s)' OR 'LB(s)') AND previous label is STAT then
        | label ← STAT
      end
      if (label before token = DATE AND label after token = DATE) then
        | label ← DATE
      end
      if label before token = STAT AND label after token = STAT then
        | label ← STAT
      end
    end
  end
end

```

### 1.3 Pre-Labeling Algorithm

```
for each sentence in corpus do
  list of tokens ← spaCyTokenize(sentence) ;
  list of labels ← list of 'O' with length = list of tokens
  for each token in list of tokens do
    entity ← getspaCyEntity(token)
    if entity is a geopolitical entity or a location then
      | label ← LOC ← spaCyLabel(token)
    end
    if token is 'global' OR 'worldwide' then
      | label ← LOC
    end
    if first character of token is a digit AND ('/' OR ':' is in the token) AND 'ratio' not
      in phrase then
      | label ← STAT
    end
    if entity is a percent AND phrase <1% AND nearby tokens do not indicate that the
      text is in a 'confidence interval' then
      | label nearby phrase as STAT
    end
    if token is 'one' OR '1' then
      | label following phrase as STAT
    end
    if token is 'per' AND (a nearby token is a digit OR a nearby entity is a cardinal
      number, ordinal number, quantity, or money) then
      | label nearby phrase as STAT
    end
    if token is 'unknown' AND an epi_type is in the sentence then
      | label ← STAT
    end
    end_token ← token at end of sentence
    for each phrase from token to end_token do
      if phrase is in set of rare diseases then
        | label all tokens in phrase as DIS
      end
      else if phrase is in set of epi types then
        | label all tokens in phrase as EPI
      end
      else if phrase is in set of epi conditional types AND an epi rate is in the sentence
        then
        | label all tokens in phrase as EPI
      end
      else if phrase is in set of biological sexes then
        | label all tokens in phrase as SEX
      end
      else if phrase is in set of dates then
        | label all tokens in phrase as DATE
      end
      if raw phrase or stemmed phrase is in set of ethnicities/nationalities/races then
        | label all tokens in phrase as ETHN
      end
      end_token ← token before end_token in sentence
    end
  end
  list of tokens and labels ← combineEntities(list of tokens, list of labels)
end
```

## 2 Disease Identification Algorithm

### 2.1 Variables used in disease identification

**Rare Disease Dictionary** = keys are disease names and synonyms, values are the respective GARD ID numbers from GARD Knowledge graph

**maxLength** = the number of words in the longest disease name or synonym in the Rare Disease Dictionary

### 2.2 Disease Identification

**Input** : Sentence from a Rare Disease Epidemiology Abstract Corpus

**Output:** List of disease names/synonyms, List of GARD IDs

```
list of tokens ← NLTK.Tokenizer(sentence)
i ← 0
diseaseList ← emptyList
GARDidList ← emptyList
while i < the length of the list of tokens do
  compareLength ← returnMinimumValue(length of list of tokens from token i to end,
    maxLength)
  while compareLength > 0 do
    phrase ← joinTokens(token at position i, token at position compareLength)
    if phrase is in GARD Dictionary keys then
      add phrase to diseaseList
      add corresponding GARD ID from GARD Dictionary to GARDidList
    end
    compareLength ← compareLength -1
  end
end
```
